# Supplementary material
Source: publisher figshare collection journal article supplement (https://sage.figshare.com/ndownloader/files/12710291)
Supplement: Supplementary file 1 [file 12710291]

## Appendix A

Table 1

*Descriptive statistics teachers' given nominations for each dimension (N = 58)*

|                                  | Range  | Mean | SD   |
|----------------------------------|--------|------|------|
| Likeability given nominations    | 0 - 9  | 3.07 | 2.13 |
| Dislikeability given nominations | 0 - 7  | 2.95 | 1.82 |
| Prosociality given nominations   | 0 - 24 | 4.91 | 3.51 |
| Risk behavior given nominations  | 0 - 6  | 1.65 | 1.63 |
| Aggression given nominations     | 0 - 6  | 2.19 | 1.67 |

Appendix B

Results of the Separate Analyses

Table 1  
*OLS regression likeability (N = 53<sup>a</sup>), unstandardized weights*

|                                         | Model 1  |       | Model 2  |       |
|-----------------------------------------|----------|-------|----------|-------|
|                                         | B        | SE    | B        | SE    |
| Intercept                               | 0.232    | 0.234 | -0.578*  | 0.251 |
| Time spent with students                |          |       | 0.030**  | 0.008 |
| Experience                              |          |       | 0.013*** | 0.003 |
| Job related well-being                  |          |       | 0.046    | 0.046 |
| Number of given likeability nominations | 0.077*** | 0.017 | 0.045*** | 0.011 |
| Teachers' sex (female=1, male=0)        | -0.066   | 0.072 | -0.125   | 0.076 |
| Classroom size                          | -0.003   | 0.011 | -0.002   | 0.008 |
| R <sup>2</sup>                          | .289     |       | .490     |       |

\*  $p < 0.05$ ; \*\*  $p < 0.01$ ; \*\*\*  $p < 0.001$

<sup>a</sup> In two classrooms the proportion of likeability nominations received had such a distribution that no students had a standardized score larger than 1. Consequently, the likeability attunement score of four teachers (two per class) could not be computed. These four teachers are missing in this model.

Table 2

*OLS regression dislikeability (N = 57), unstandardized weights*

|                                               | Model 1 |       | Model 2 |       |
|-----------------------------------------------|---------|-------|---------|-------|
|                                               | B       | SE    | B       | SE    |
| Intercept                                     | 0.585   | 0.291 | 0.388   | 0.370 |
| Time spent with students                      |         |       | 0.037*  | 0.015 |
| Experience                                    |         |       | 0.002   | 0.004 |
| Job related well-being                        |         |       | -0.013  | 0.048 |
| Number of given<br>dislikeability nominations | 0.052*  | 0.023 | 0.028   | 0.026 |
| Teachers' sex (female=1,<br>male=0)           | -0.053  | 0.090 | -0.057  | 0.095 |
| Classroom size                                | -0.17   | 0.013 | -0.014  | 0.015 |
| R <sup>2</sup>                                | .119    |       | .253    |       |

\* p &lt; 0.05; \*\* p &lt; 0.01; \*\*\* p &lt; 0.001

Table 3

*OLS regression prosociality (N = 57), unstandardized weights*

|                                             | Model 1   |       | Model 2  |       |
|---------------------------------------------|-----------|-------|----------|-------|
|                                             | B         | SE    | B        | SE    |
| Intercept                                   | 1.320***  | 0.241 | 1.284*** | 0.321 |
| Time spent with students                    |           |       | 0.019    | 0.009 |
| Experience                                  |           |       | 0.001    | 0.004 |
| Job related well-being                      |           |       | -0.035   | 0.052 |
| Number of given<br>prosociality nominations | 0.053**   | 0.013 | 0.052*** | 0.012 |
| Teachers' sex (female=1,<br>male=0)         | -0.132*   | 0.053 | -0.117*  | 0.055 |
| Classroom size                              | -0.042*** | 0.009 | -0.042** | 0.012 |
| R <sup>2</sup>                              | .471      |       | .519     |       |

\* p &lt; 0.05; \*\* p &lt; 0.01; \*\*\* p &lt; 0.001

Table 4  
*OLS regression aggression (N = 57), unstandardized weights*

|                                        | Model 1  |       | Model 2  |       |
|----------------------------------------|----------|-------|----------|-------|
|                                        | B        | SE    | B        | SE    |
| Intercept                              | 0.404    | 0.390 | 0.493    | 0.531 |
| Time spent with students               |          |       | 0.011    | 0.012 |
| Experience                             |          |       | 0.001    | 0.004 |
| Job related well-being                 |          |       | -0.049   | 0.071 |
| Number of given aggression nominations | 0.180*** | 0.023 | 0.173*** | 0.025 |
| Teachers' sex (female=1, male=0)       | 0.082*   | 0.190 | 0.090    | 0.195 |
| Classroom size                         | -0.016   | 0.014 | -0.016   | 0.014 |
| R <sup>2</sup>                         | .528     |       | .542     |       |

\* p < 0.05; \*\* p < 0.01; \*\*\* p < 0.001

Table 5  
*OLS regression risk behavior (N = 57), unstandardized weights*

|                                            | Model 1  |       | Model 2  |       |
|--------------------------------------------|----------|-------|----------|-------|
|                                            | B        | SE    | B        | SE    |
| Intercept                                  | 0.535    | 0.457 | 0.640    | 0.407 |
| Time spent with students                   |          |       | 0.005    | 0.016 |
| Experience                                 |          |       | 0.010*   | 0.004 |
| Job related well-being                     |          |       | -0.106   | 0.085 |
| Number of given risk behaviors nominations | 0.175*** | 0.027 | 0.157*** | 0.027 |
| Teachers' sex (female=1, male=0)           | -0.193   | 0.161 | -0.235   | 0.169 |
| Classroom size                             | -0.006   | 0.017 | -0.012   | 0.014 |
| R <sup>2</sup>                             | .504     |       | .585     |       |

\* p < 0.05; \*\* p < 0.01; \*\*\* p < 0.001
